# Supplementary material
Source: PubMed Central journal article supplement (PMC2953713)
Supplement: NIHMS237544-supplement-Suppl_fig_4.pdf [file NIHMS237544-supplement-Suppl_fig_4.pdf]

Normal

Marfan

Stiff Skin

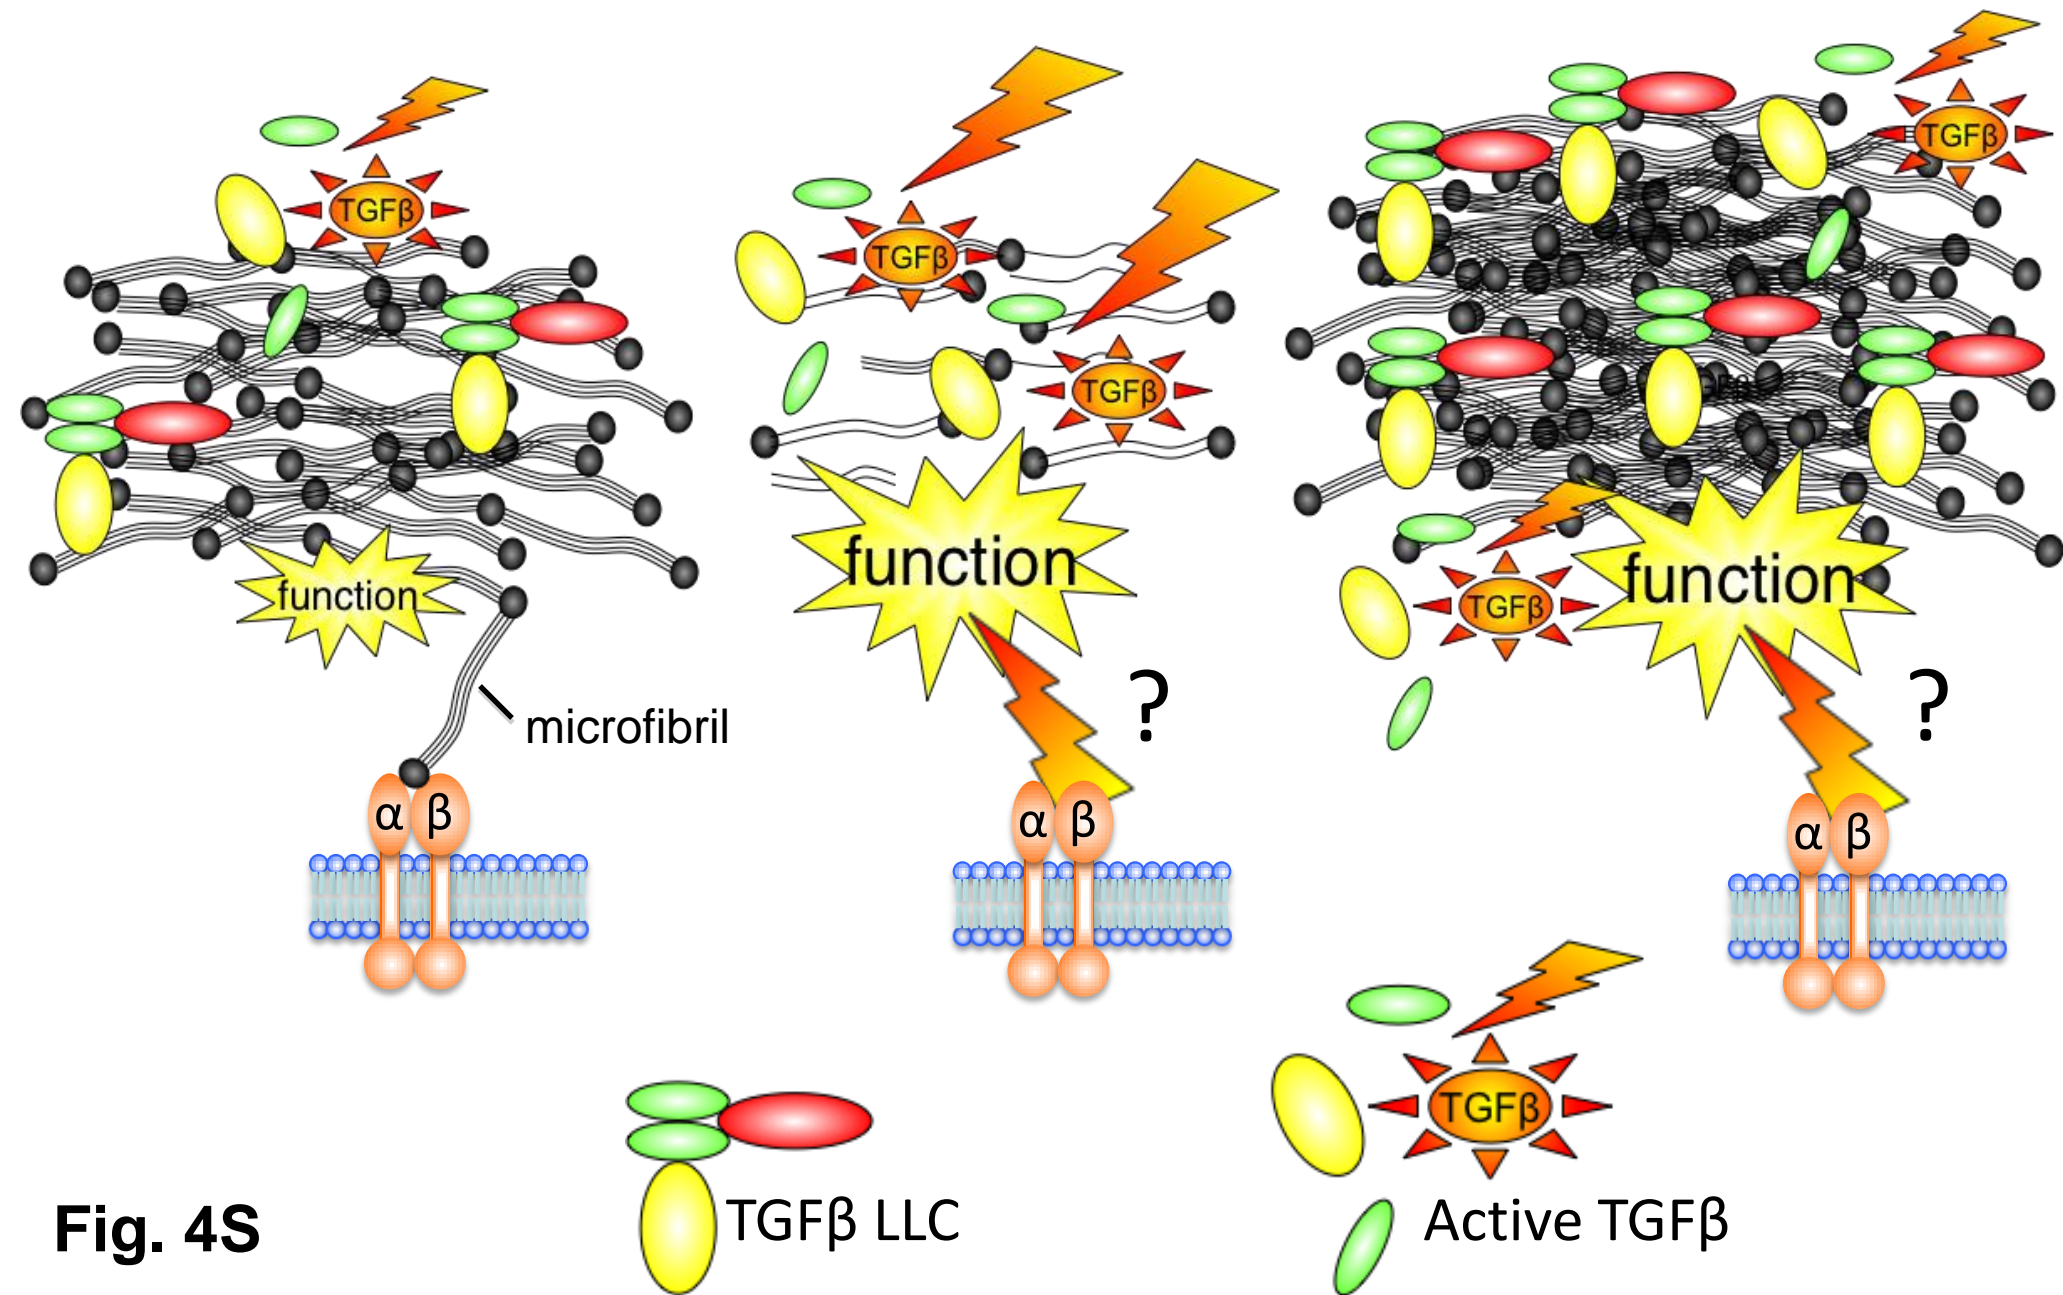

Fig. 4S

**Fig 4S.** Normal: TGF $\beta$  activity (proportionate to the size of the starburst labeled “function”) integrates cytokine concentration and activation (proportionate to the size of lightning bolts) and both are regulated by microfibrils (composed of fibrillin-1). The local concentration of the TGF $\beta$  large latent complex (LLC) is dependent on the concentration of microfibrils. Binding of integrins (subunits labeled  $\alpha$  and  $\beta$ ) by the fibrillin-1 component of microfibrils may limit their participation in TGF $\beta$  activation. Marfan syndrome: decreased TGF $\beta$  concentration (as a consequence of decreased microfibrils) is offset by increased activation. Integrins that are unoccupied by fibrillin-1 may contribute to TGF $\beta$  activation. Sustained signaling is dependent on ongoing production of TGF $\beta$ . SSS: increased concentration of TGF $\beta$  (as a consequence of increased microfibrillar deposition) sustains a chronic increased level of TGF $\beta$  signaling whether or not the abnormal character of microfibrils and altered interaction with integrins promotes increased TGF $\beta$  activation. Components of the LLC: latent transforming growth factor binding protein (LTBP; yellow oval); latency associated peptide (LAP; green ovals); transforming growth factor beta (TGF $\beta$ ; red oval).
